# Supplementary material for: Combination of ozonation with GAC, AIX and biochar post-treatment for removal of pharmaceuticals and transformation products from municipal WWTP effluent
Source: Royal Society of Chemistry journal article supplement (doi:10.1039/d4ew00702f), 2024-01-01
Supplement: d4ew00702f1.pdf [file d4ew00702f1.pdf]

## Supplementary Information

### Combination of ozonation with GAC. AIX and biochar post-treatment for removal of pharmaceuticals and transformation products from municipal WWTP effluent

Malhun Fakioglu<sup>\*.1,2</sup>, Oksana Golovko<sup>2</sup>, Christian Baresel<sup>3</sup>, Lutz Ahrens<sup>2</sup>, Izzet Ozturk<sup>1</sup>

<sup>1</sup> Istanbul Technical University, Civil Engineering Faculty, Department of Environmental Engineering, Maslak, 34469, Istanbul, Turkey

<sup>2</sup> Swedish University of Agricultural Sciences, Department of Aquatic Sciences and Assessment, P.O. Box 7050, 75007 Uppsala, Sweden

<sup>3</sup> IVL Swedish Environmental Research Institute, Valhallavägen 81, 114 28 Stockholm, Sweden

\* fakioglu@itu.edu.tr

**Table S1.** Characterization of the effluent wastewater used in the tests.

| Parameter                                              | Unit                    | Mean±standard deviation |
|--------------------------------------------------------|-------------------------|-------------------------|
| pH                                                     | -                       | 7.53±0.12               |
| Temperature                                            | °C                      | 18.6±1.12               |
| Dissolved organic carbon (DOC)                         | mg/L                    | 9.42±3.70               |
| Total organic carbon (TOC)                             | mg/L                    | 9.98±4.12               |
| Alkalinity                                             | mg CaCO <sub>3</sub> /L | 166±38                  |
| Total suspended solids (TSS)                           | mg/L                    | 11.8±8.25               |
| Chemical oxygen demand (COD)                           | mg/L                    | 28.2±11.2               |
| Nitrite nitrogen (NO <sub>2</sub> -N)                  | mg/L                    | 0.01±0.01               |
| Nitrate nitrogen (NO <sub>3</sub> -N)                  | mg/L                    | 8.21±3.02               |
| Ammonia nitrogen (NH <sub>3</sub> -N)                  | mg/L                    | 0.11±0.13               |
| UV <sub>254</sub>                                      | cm <sup>-1</sup>        | 0.14±0.04               |
| Bromide (Br <sup>-</sup> )                             | mg/L                    | 0.53±0.41               |
| Bromate (BrO <sub>3</sub> <sup>-</sup> )               | µg/L                    | <5.0                    |
| Specific ultraviolet absorbance (SUVA <sub>254</sub> ) | mg/L.cm                 | 1.60±0.21               |

**Table S2.** LOQ values of all selected pharmaceuticals and their metabolites

| <b>Pharmaceutical</b>           | <b>LOQ</b> |
|---------------------------------|------------|
| Atenolol                        | < 7.2      |
| Bicalutamide                    | < 8.6      |
| Carbamazepine                   | < 5.4      |
| Cetirizine                      | < 5.6      |
| Citalopram                      | < 4.4      |
| Clarithromycin                  | < 7.1      |
| Clindamycin                     | < 7.7      |
| Desvenlafaxine                  | < 5.1      |
| Diclofenac                      | < 3.1      |
| Erythromycin                    | < 12       |
| Fexofenadine                    | < 8.7      |
| Fluconazole                     | < 6.4      |
| Furosemide                      | < 7.6      |
| Irbesartan                      | < 7        |
| Lamotrigine                     | < 5.5      |
| Losartan                        | < 11       |
| Metoprolol                      | < 7.1      |
| Oxazepam                        | < 4.9      |
| Propranolol                     | < 8.1      |
| Sertraline                      | < 4.9      |
| Sulfamethoxazole                | < 11       |
| Tramadol                        | < 6.5      |
| Trimethoprim                    | < 11       |
| Venlafaxine                     | < 4.2      |
|                                 |            |
| <b>Metabolite</b>               | <b>LOQ</b> |
| 4 hydroxy diclofenac            | < 2.6      |
| 4-chloro 5-sulfamoylanthranilic | < 75       |

|                               |       |
|-------------------------------|-------|
| acid                          |       |
| Alpha hydroxymetoprolol       | < 6.2 |
| Citalopram related compound E | < 5.2 |
| Fluconazole N-oxide           | < 7.6 |
| N-demethylerythromycin        | < 11  |
| Norsertaline                  | < 220 |

**Table S3.** Concentrations of the selected pharmaceuticals in the filtered effluent and after each treatment step

| <b>Ozone dosage: 0.28 g O<sub>3</sub>/ g DOC - Day 1</b> |                   |                   |       |      |           |           |           |
|----------------------------------------------------------|-------------------|-------------------|-------|------|-----------|-----------|-----------|
| Micropollutant                                           | Filtered Effluent | Equalization Tank | GAC   | AIX  | Reference | Biochar 1 | Biochar 2 |
| Atenolol                                                 | 175               | 147               | < 7.2 | 146  | 149       | < 7.2     | 31.9      |
| Metoprolol                                               | 1773              | 1615              | < 7.1 | 1637 | 1383      | < 7.1     | 180       |
| Carbamazepine                                            | 387               | 179               | < 5.4 | 142  | 161       | < 5.4     | 54.3      |
| Cetirizine                                               | 240               | 114               | < 5.6 | 56.4 | 94.1      | < 5.6     | 29.6      |
| Citalopram                                               | 179               | 58.8              | < 4.4 | 55.1 | 48.7      | < 4.4     | < 4.4     |
| Oxazepam                                                 | 466               | 332               | < 4.9 | 258  | 294       | < 4.9     | 78.5      |
| Lamotrigine                                              | 2005              | 1164              | 17.4  | 1068 | 1055      | 8.9       | 296       |
| Bicalutamide                                             | 6517              | 2228              | < 8.6 | 1085 | 1844      | < 8.6     | 68.5      |
| Clarithromycin                                           | 203               | 18.8              | < 7.1 | 15.8 | 11.3      | < 7.1     | < 7.1     |
| Clindamycin                                              | 630               | 74.5              | < 7.7 | 70.5 | 56.0      | < 7.7     | 8.2       |
| Fexofenadine                                             | 8387              | 1868              | < 8.7 | 1488 | 1332      | < 8.7     | 255       |
| Propranolol                                              | 638               | 118               | < 8.1 | 100  | 81.2      | < 8.1     | < 8.1     |
| Tramadol                                                 | 502               | 593               | < 6.5 | 519  | 450       | < 6.5     | 166       |
| Fluconazole                                              | 150               | 187               | < 6.4 | 168  | 157       | < 6.4     | 62.8      |
| Diclofenac                                               | 540               | 198               | < 3.1 | 71.8 | 163       | < 3.1     | 44.9      |
| Furosemide                                               | 302               | 69.5              | < 7.6 | 26.2 | 67.6      | < 7.6     | 29.3      |
| Irbesartan                                               | 69                | 54.5              | < 7   | 22.6 | 49.4      | < 7       | 15.8      |
| Losartan                                                 | 558               | 344               | < 11  | 144  | 288       | < 11      | 80.5      |
| Sulfamethoxazole                                         | 188               | 134               | < 11  | 74.9 | 87.6      | < 11      | 53.5      |

|                |       |       |       |       |       |       |       |
|----------------|-------|-------|-------|-------|-------|-------|-------|
| Trimethoprim   | 176   | 62.4  | < 11  | 60.5  | 52.4  | < 11  | < 11  |
| Erythromycin   | 2094  | 834   | < 12  | 850   | 800   | < 12  | 342   |
| Norsertaline   | < 220 | < 220 | < 220 | < 220 | < 220 | < 220 | < 220 |
| Sertraline     | 76.8  | 19.4  | < 4.9 | 11.2  | 11.5  | < 4.9 | < 4.9 |
| Venlafaxine    | 482   | 392   | < 4.2 | 344   | 299   | < 4.2 | 108   |
| Desvenlafaxine | 544   | 359   | < 5.1 | 329   | 287   | < 5.1 | 88.2  |

| <b>Ozone dosage: 0.28 g O<sub>3</sub>/ g DOC - Day 5</b> |                   |                   |       |      |           |           |           |
|----------------------------------------------------------|-------------------|-------------------|-------|------|-----------|-----------|-----------|
| Micropollutant                                           | Filtered Effluent | Equalization Tank | GAC   | AIX  | Reference | Biochar 1 | Biochar 2 |
| Atenolol                                                 | 153               | 124               | < 7.2 | 138  | 146       | < 7.2     | 37.6      |
| Metoprolol                                               | 1876              | 1330              | < 7.1 | 1771 | 1622      | 16.0      | 186       |
| Carbamazepine                                            | 378               | 76.0              | < 5.4 | 84.1 | 85.7      | 19.1      | 64.5      |
| Cetirizine                                               | 261               | 36.0              | < 5.6 | 22.0 | 39.3      | < 5.6     | 17.9      |
| Citalopram                                               | 181               | 23.7              | < 4.4 | 25.9 | 25.3      | < 4.4     | < 4.4     |
| Oxazepam                                                 | 461               | 304               | < 4.9 | 254  | 342       | 9.1       | 82.8      |
| Lamotrigine                                              | 2388              | 1067              | < 5.5 | 1118 | 1217      | 61.9      | 348       |
| Bicalutamide                                             | 6828              | 1452              | < 8.6 | 662  | 1418      | < 8.6     | 62.3      |
| Clarithromycin                                           | 543               | 12.2              | < 7.1 | 11.1 | 9.8       | < 7.1     | < 7.1     |
| Clindamycin                                              | 988               | 10.6              | < 7.7 | 16.0 | 16.3      | < 7.7     | < 7.7     |
| Fexofenadine                                             | 11154             | 760               | < 8.7 | 668  | 730       | 16.4      | 209       |
| Propranolol                                              | 775               | 25.6              | < 8.1 | 28.9 | 22.9      | < 8.1     | < 8.1     |
| Tramadol                                                 | 474               | 290               | < 6.5 | 255  | 342       | 25.9      | 165       |
| Fluconazole                                              | 145               | 166               | < 6.4 | 150  | 197       | 15.6      | 94.4      |
| Diclofenac                                               | 538               | 41.8              | < 3.1 | 11.1 | 61.9      | 5.7       | 34.2      |
| Furosemide                                               | 245               | 16.0              | < 7.6 | 8.7  | 14.9      | < 7.6     | < 7.6     |
| Irbesartan                                               | 85                | 48.6              | < 7   | 19.7 | 53.8      | < 7       | 19.2      |
| Losartan                                                 | 842               | 216               | < 11  | 89.9 | 261       | 12.1      | 85.5      |
| Sulfamethoxazole                                         | 328               | 40.9              | < 11  | 43.6 | 85.4      | 12.0      | 48.1      |
| Trimethoprim                                             | 221               | 13.0              | < 11  | 16.0 | 13.5      | < 11      | < 11      |
| Erythromycin                                             | 1444              | 513               | < 12  | 666  | 624       | 58.5      | 434       |



|                |      |      |       |      |     |       |       |
|----------------|------|------|-------|------|-----|-------|-------|
| Sertraline     | 92.6 | 17.7 | < 4.9 | 11.4 | 9.1 | < 4.9 | < 4.9 |
| Venlafaxine    | 678  | 197  | < 4.2 | 255  | 247 | 73.4  | 170   |
| Desvenlafaxine | 718  | 158  | < 5.1 | 203  | 205 | 59.7  | 109   |

| <b>Ozone dosage: 0.96 g O<sub>3</sub>/ g DOC - Day 1</b> |                   |                   |       |       |           |           |           |
|----------------------------------------------------------|-------------------|-------------------|-------|-------|-----------|-----------|-----------|
| Micropollutant                                           | Filtered Effluent | Equalization Tank | GAC   | AIX   | Reference | Biochar 1 | Biochar 2 |
| Atenolol                                                 | 346               | 65.0              | < 7.2 | 61.7  | 61.8      | < 7.2     | 11.5      |
| Metoprolol                                               | 2379              | 487               | < 7.1 | 561   | 487       | < 7.1     | 58.9      |
| Carbamazepine                                            | 4166              | 16.7              | < 5.4 | 12.0  | 14.9      | < 5.4     | < 5.4     |
| Cetirizine                                               | 2381              | 8.0               | < 5.6 | < 5.6 | 7.9       | < 5.6     | < 5.6     |
| Citalopram                                               | 2845              | 15.2              | < 4.4 | 12.3  | 13.1      | < 4.4     | < 4.4     |
| Oxazepam                                                 | 5152              | 179               | < 4.9 | 84.3  | 177       | < 4.9     | 42.8      |
| Lamotrigine                                              | 25922             | 915               | < 5.5 | 715   | 859       | 7.3       | 285       |
| Bicalutamide                                             | 19659             | 350               | < 8.6 | 18.0  | 322       | < 8.6     | 23.3      |
| Clarithromycin                                           | 2119              | < 7.1             | < 7.1 | < 7.1 | < 7.1     | < 7.1     | < 7.1     |
| Clindamycin                                              | 3280              | < 7.7             | < 7.7 | < 7.7 | < 7.7     | < 7.7     | < 7.7     |
| Fexofenadine                                             | 14250             | 84.8              | < 8.7 | 52.4  | 81.3      | < 8.7     | 22.9      |
| Propranolol                                              | 2118              | < 8.1             | < 8.1 | < 8.1 | < 8.1     | < 8.1     | < 8.1     |
| Tramadol                                                 | 4527              | 157               | < 6.5 | 147   | 125       | < 6.5     | 50.6      |
| Fluconazole                                              | 465               | 82.5              | < 6.4 | 72.7  | 68.3      | < 6.4     | 30.7      |
| Diclofenac                                               | 405               | 79.5              | 89.5  | 64.5  | 98.5      | 83.8      | 137       |
| Furosemide                                               | 1434              | < 7.6             | < 7.6 | < 7.6 | < 7.6     | < 7.6     | < 7.6     |
| Irbesartan                                               | 803               | 22.2              | < 7   | < 7   | 24.4      | < 7       | < 7       |
| Losartan                                                 | 1322              | 15.3              | < 11  | < 11  | 19.1      | < 11      | < 11      |
| Sulfamethoxazole                                         | 415               | 15.3              | < 11  | < 11  | 19.1      | < 11      | < 11      |
| Trimethoprim                                             | 46.0              | 27.8              | < 11  | 21.0  | 27.3      | < 11      | < 11      |
| Erythromycin                                             | 156               | < 12              | < 12  | < 12  | < 12      | < 12      | < 12      |
| Norsertaline                                             | < 220             | < 220             | < 220 | < 220 | < 220     | < 220     | < 220     |
| Sertraline                                               | 102               | < 4.9             | < 4.9 | < 4.9 | < 4.9     | < 4.9     | < 4.9     |
| Venlafaxine                                              | 13402             | 88.6              | < 4.2 | 85.2  | 80.9      | < 4.2     | 26.3      |

|                |       |      |       |      |      |       |      |
|----------------|-------|------|-------|------|------|-------|------|
| Desvenlafaxine | 18508 | 71.5 | < 5.1 | 68.7 | 66.1 | < 5.1 | 22.6 |
|----------------|-------|------|-------|------|------|-------|------|

| <b>Ozone dosage: 0.96 g O<sub>3</sub>/ g DOC - Day 5</b> |                   |                   |       |       |           |           |           |
|----------------------------------------------------------|-------------------|-------------------|-------|-------|-----------|-----------|-----------|
| Micropollutant                                           | Filtered Effluent | Equalization Tank | GAC   | AIX   | Reference | Biochar 1 | Biochar 2 |
| Atenolol                                                 | 335               | 204               | < 7.2 | 48.0  | 47.9      | < 7.2     | < 7.2     |
| Metoprolol                                               | 1542              | 1165              | < 7.1 | 417   | 313       | 19.3      | 21.3      |
| Carbamazepine                                            | 3185              | 41.2              | < 5.4 | < 5.4 | 6.2       | < 5.4     | < 5.4     |
| Cetirizine                                               | 1833              | 27.3              | < 5.6 | < 5.6 | < 5.6     | < 5.6     | < 5.6     |
| Citalopram                                               | 1977              | 46.2              | < 4.4 | 9.1   | 10.1      | < 4.4     | < 4.4     |
| Oxazepam                                                 | 3334              | 309               | < 4.9 | 107   | 113       | 18.1      | 23.9      |
| Lamotrigine                                              | 16776             | 1366              | < 5.5 | 859   | 901       | 211       | 226       |
| Bicalutamide                                             | 17000             | 609               | < 8.6 | 189   | 293       | 17.0      | 9.2       |
| Clarithromycin                                           | 1562              | < 7.1             | < 7.1 | < 7.1 | < 7.1     | < 7.1     | < 7.1     |
| Clindamycin                                              | 1979              | < 7.7             | < 7.7 | < 7.7 | < 7.7     | < 7.7     | < 7.7     |
| Fexofenadine                                             | 9242              | 277               | < 8.7 | 73.4  | 75.2      | 11.7      | 14.3      |
| Propranolol                                              | 1481              | < 8.1             | < 8.1 | < 8.1 | < 8.1     | < 8.1     | < 8.1     |
| Tramadol                                                 | 2782              | 451               | < 6.5 | 69.6  | 82.0      | 13.0      | 21.7      |
| Fluconazole                                              | 340               | 117               | < 6.4 | 52.9  | 62.7      | 11.8      | 20.0      |
| Diclofenac                                               | 264               | 48.3              | 19.3  | 15.4  | 22.2      | 24.7      | 26.3      |
| Furosemide                                               | 1278              | < 7.6             | < 7.6 | < 7.6 | < 7.6     | < 7.6     | < 7.6     |
| Irbesartan                                               | 627               | 16.3              | < 7   | 13.3  | 17.8      | < 7       | < 7       |
| Losartan                                                 | 791               | 25.7              | < 11  | 16.9  | 21.4      | < 11      | 11.9      |
| Sulfamethoxazole                                         | 388               | 25.7              | < 11  | 16.9  | 21.4      | < 11      | 11.9      |
| Trimethoprim                                             | 32.3              | 46.5              | < 11  | 18.3  | 17.4      | < 11      | < 11      |
| Erythromycin                                             | 167               | < 12              | < 12  | < 12  | < 12      | < 12      | < 12      |
| Norsertaline                                             | < 220             | < 220             | < 220 | < 220 | < 220     | < 220     | < 220     |
| Sertraline                                               | 89.8              | 20.1              | < 4.9 | < 4.9 | < 4.9     | < 4.9     | < 4.9     |
| Venlafaxine                                              | 9103              | 288               | < 4.2 | 59.3  | 57.3      | 10.8      | 19.1      |
| Desvenlafaxine                                           | 12325             | 228               | < 5.1 | 44.0  | 45.3      | 9.7       | 15.1      |

| <b>Ozone dosage: 0.96 g O<sub>3</sub>/ g DOC - Day 12</b> |                   |                   |       |       |           |           |           |
|-----------------------------------------------------------|-------------------|-------------------|-------|-------|-----------|-----------|-----------|
| Micropollutant                                            | Filtered Effluent | Equalization Tank | GAC   | AIX   | Reference | Biochar 1 | Biochar 2 |
| Atenolol                                                  | 387               | 25.9              | < 7.2 | 15.8  | 16.9      | < 7.2     | < 7.2     |
| Metoprolol                                                | 1481              | 127               | < 7.1 | 89.1  | 104       | < 7.1     | < 7.1     |
| Carbamazepine                                             | 3724              | < 5.4             | < 5.4 | < 5.4 | < 5.4     | < 5.4     | < 5.4     |
| Cetirizine                                                | 2335              | < 5.6             | < 5.6 | < 5.6 | < 5.6     | < 5.6     | < 5.6     |
| Citalopram                                                | 2446              | < 4.4             | < 4.4 | < 4.4 | < 4.4     | < 4.4     | < 4.4     |
| Oxazepam                                                  | 3734              | 93.9              | < 4.9 | 70.2  | 68.8      | < 4.9     | 13.2      |
| Lamotrigine                                               | 17861             | 840               | < 5.5 | 784   | 715       | 35.7      | 147       |
| Bicalutamide                                              | 12520             | 192               | < 8.6 | 115   | 161       | < 8.6     | < 8.6     |
| Clarithromycin                                            | 2031              | < 7.1             | < 7.1 | < 7.1 | < 7.1     | < 7.1     | < 7.1     |
| Clindamycin                                               | 1581              | < 7.7             | < 7.7 | < 7.7 | < 7.7     | < 7.7     | < 7.7     |
| Fexofenadine                                              | 7578              | 21.2              | < 8.7 | 18.0  | 17.7      | < 8.7     | < 8.7     |
| Propranolol                                               | 1458              | < 8.1             | < 8.1 | < 8.1 | < 8.1     | < 8.1     | < 8.1     |
| Tramadol                                                  | 3049              | 14.9              | < 6.5 | 11.4  | 12.5      | < 6.5     | 8.6       |
| Fluconazole                                               | 344               | 40.3              | < 6.4 | 28.7  | 30.7      | < 6.4     | 14.3      |
| Diclofenac                                                | 263               | 117               | 41.6  | 29.9  | 25.4      | 129       | 79.1      |
| Furosemide                                                | 1212              | < 7.6             | < 7.6 | < 7.6 | < 7.6     | < 7.6     | < 7.6     |
| Irbesartan                                                | 777               | 13.0              | < 7   | 8.0   | 10.5      | < 7       | < 7       |
| Losartan                                                  | 1101              | 16.4              | < 11  | < 11  | 11.9      | < 11      | < 11      |
| Sulfamethoxazole                                          | 110.              | < 11              | < 11  | < 11  | < 11      | < 11      | < 11      |
| Trimethoprim                                              | 173               | < 11              | < 11  | < 11  | < 11      | < 11      | < 11      |
| Erythromycin                                              | 212               | < 12              | < 12  | < 12  | < 12      | < 12      | < 12      |
| Norsertaline                                              | < 220             | < 220             | < 220 | < 220 | < 220     | < 220     | < 220     |
| Sertraline                                                | 139               | < 4.9             | < 4.9 | < 4.9 | < 4.9     | < 4.9     | < 4.9     |
| Venlafaxine                                               | 10190             | 18.5              | < 4.2 | 13.5  | 14.8      | < 4.2     | 12.4      |
| Desvenlafaxine                                            | 13438             | 11.0              | < 5.1 | 8.6   | 9.4       | < 5.1     | 8.1       |

| <b>Ozone dosage: 2.17 g O<sub>3</sub>/ g DOC - Day 1</b> |                   |                   |     |     |           |           |           |
|----------------------------------------------------------|-------------------|-------------------|-----|-----|-----------|-----------|-----------|
| Micropollutant                                           | Filtered Effluent | Equalization Tank | GAC | AIX | Reference | Biochar 1 | Biochar 2 |



|                  |       |       |       |       |       |       |       |
|------------------|-------|-------|-------|-------|-------|-------|-------|
| Atenolol         | 304   | 23.1  | < 7.2 | 21.9  | 21.8  | < 7.2 | < 7.2 |
| Metoprolol       | 1014  | 97.2  | < 7.1 | 76.2  | 70.9  | < 7.1 | < 7.1 |
| Carbamazepine    | 4548  | < 5.4 | < 5.4 | < 5.4 | < 5.4 | < 5.4 | < 5.4 |
| Cetirizine       | 2552  | < 5.6 | < 5.6 | < 5.6 | < 5.6 | < 5.6 | < 5.6 |
| Citalopram       | 2537  | < 4.4 | < 4.4 | < 4.4 | < 4.4 | < 4.4 | < 4.4 |
| Oxazepam         | 2856  | 65.9  | < 4.9 | 49.4  | 67.6  | < 4.9 | < 4.9 |
| Lamotrigine      | 12315 | 660   | < 5.5 | 569   | 535   | < 5.5 | 40.5  |
| Bicalutamide     | 10386 | 136   | < 8.6 | 15.4  | 185   | < 8.6 | < 8.6 |
| Clarithromycin   | 1640  | < 7.1 | < 7.1 | < 7.1 | < 7.1 | < 7.1 | < 7.1 |
| Clindamycin      | 1573  | < 7.7 | < 7.7 | < 7.7 | < 7.7 | < 7.7 | < 7.7 |
| Fexofenadine     | 8520  | 16.5  | < 8.7 | 10.9  | 16.0  | < 8.7 | < 8.7 |
| Propranolol      | 1731  | < 8.1 | < 8.1 | < 8.1 | < 8.1 | < 8.1 | < 8.1 |
| Tramadol         | 1490  | 13.9  | < 6.5 | 13.0  | 12.3  | < 6.5 | < 6.5 |
| Fluconazole      | 231   | 26.6  | < 6.4 | 26.0  | 24.4  | < 6.4 | < 6.4 |
| Diclofenac       | 135   | 50.6  | 159   | 61.0  | 59.1  | 92.8  | 101   |
| Furosemide       | 551   | < 7.6 | < 7.6 | < 7.6 | < 7.6 | < 7.6 | < 7.6 |
| Irbesartan       | 939   | 8.6   | < 7   | < 7   | 7.4   | < 7   | < 7   |
| Losartan         | 1481  | < 11  | < 11  | < 11  | < 11  | < 11  | < 11  |
| Sulfamethoxazole | 119   | < 11  | < 11  | < 11  | < 11  | < 11  | < 11  |
| Trimethoprim     | 147   | < 11  | < 11  | < 11  | < 11  | < 11  | < 11  |
| Erythromycin     | 454   | 19.0  | < 12  | 23.1  | 19.8  | < 12  | < 12  |
| Norsertraline    | < 220 | < 220 | < 220 | < 220 | < 220 | < 220 | < 220 |
| Sertraline       | 110   | < 4.9 | < 4.9 | < 4.9 | < 4.9 | < 4.9 | < 4.9 |
| Venlafaxine      | 7629  | 19.3  | < 4.2 | 18.9  | 20.7  | < 4.2 | < 4.2 |
| Desvenlafaxine   | 7759  | 10.8  | < 5.1 | 9.6   | 10.3  | < 5.1 | < 5.1 |

| <b>Ozone dosage: 2.17 g O<sub>3</sub>/ g DOC - Day 5</b> |                   |                   |       |      |           |           |           |
|----------------------------------------------------------|-------------------|-------------------|-------|------|-----------|-----------|-----------|
| Micropollutant                                           | Filtered Effluent | Equalization Tank | GAC   | AIX  | Reference | Biochar 1 | Biochar 2 |
| Atenolol                                                 | 310               | 20.7              | < 7.2 | 20.3 | 19.0      | < 7.2     | < 7.2     |
| Metoprolol                                               | 922               | 72.3              | < 7.1 | 67.0 | 62.6      | < 7.1     | < 7.1     |



|                  |       |       |       |       |       |       |       |
|------------------|-------|-------|-------|-------|-------|-------|-------|
| Citalopram       | 926   | < 4.4 | < 4.4 | < 4.4 | < 4.4 | < 4.4 | < 4.4 |
| Oxazepam         | 1046  | 34.8  | < 4.9 | 34.0  | 34.6  | 5.2   | 8.3   |
| Lamotrigine      | 6826  | 442   | < 5.5 | 457   | 428   | 111   | 152   |
| Bicalutamide     | 6022  | 93.4  | < 8.6 | 98.6  | 90.6  | 9.7   | 10.3  |
| Clarithromycin   | 775   | < 7.1 | < 7.1 | < 7.1 | < 7.1 | < 7.1 | < 7.1 |
| Clindamycin      | 803   | < 7.7 | < 7.7 | < 7.7 | < 7.7 | < 7.7 | < 7.7 |
| Fexofenadine     | 3032  | < 8.7 | < 8.7 | < 8.7 | < 8.7 | < 8.7 | < 8.7 |
| Propranolol      | 654   | < 8.1 | < 8.1 | < 8.1 | < 8.1 | < 8.1 | < 8.1 |
| Tramadol         | 655   | < 6.5 | < 6.5 | < 6.5 | < 6.5 | < 6.5 | < 6.5 |
| Fluconazole      | 149   | 15.2  | < 6.4 | 17.0  | 15.2  | < 6.4 | 7.8   |
| Diclofenac       | 67.4  | 50.9  | 12.8  | 42.0  | 19.3  | 84.3  | 115   |
| Furosemide       | 303   | < 7.6 | < 7.6 | < 7.6 | < 7.6 | < 7.6 | < 7.6 |
| Irbesartan       | 203   | < 7   | < 7   | < 7   | < 7   | < 7   | < 7   |
| Losartan         | 610   | < 11  | < 11  | < 11  | < 11  | < 11  | < 11  |
| Sulfamethoxazole | 316   | < 11  | < 11  | < 11  | < 11  | < 11  | < 11  |
| Trimethoprim     | 11.5  | < 11  | < 11  | < 11  | < 11  | < 11  | < 11  |
| Erythromycin     | 132   | < 12  | < 12  | < 12  | < 12  | < 12  | < 12  |
| Norsertaline     | < 220 | < 220 | < 220 | < 220 | < 220 | < 220 | < 220 |
| Sertraline       | 70.8  | < 4.9 | < 4.9 | < 4.9 | < 4.9 | < 4.9 | < 4.9 |
| Venlafaxine      | 2212  | 4.3   | < 4.2 | 5.0   | < 4.2 | < 4.2 | 4.7   |
| Desvenlafaxine   | 3733  | < 5.1 | < 5.1 | < 5.1 | < 5.1 | < 5.1 | 5.8   |

**Table S4.** Concentrations of transformation products in the filtered effluent and after each treatment step (Specific ozone dosage : 0.28 g O<sub>3</sub>/ g DOC)

| Ozone dosage: 0.28 g O <sub>3</sub> / g DOC - Day 1 |                   |                   |      |      |           |           |           |
|-----------------------------------------------------|-------------------|-------------------|------|------|-----------|-----------|-----------|
| Transformation Products                             | Filtered Effluent | Equalization Tank | GAC  | AIX  | Reference | Biochar 1 | Biochar 2 |
| Alpha hydroxymetoprolol                             | 128               | 74.3              | <6.2 | 65.1 | 64.7      | <6.2      | 14.7      |
| Citalopram related compound E                       | 25.0              | 13.0              | <5.2 | 19.5 | 25.4      | <5.2      | 7.3       |
| Fluconazole N-oxide                                 | 60.5              | <7.6              | 8.9  | <7.6 | <7.6      | 13.1      | 34.7      |
| 4 hydroxy diclofenac                                | 4.6               | 3.0               | <2.6 | <2.6 | <2.6      | <2.6      | 2.6       |

|                                                           |                   |                   |      |      |           |           |           |
|-----------------------------------------------------------|-------------------|-------------------|------|------|-----------|-----------|-----------|
| 4-chloro 5-sulfamoylanthranilic acid                      | 497               | 390               | < 75 | 364  | 502       | < 75      | 241       |
| N-demethylerythromycin                                    | < 11              | < 11              | < 11 | < 11 | < 11      | < 11      | < 11      |
| Desvenlafaxine                                            | 2665              | 149               | <5.1 | 142  | 163       | <5.1      | 48.0      |
| <b>Ozone dosage: 0.28 g O<sub>3</sub>/ g DOC - Day 5</b>  |                   |                   |      |      |           |           |           |
|                                                           | Filtered Effluent | Equalization Tank | GAC  | AIX  | Reference | Biochar 1 | Biochar 2 |
| Alpha hydroxymetoprolol                                   | 137               | 57.6              | <6.2 | 56.2 | 60.2      | 6.2       | 17.4      |
| Citalopram related compound E                             | 23.1              | 24.5              | <5.2 | 29.4 | 39.4      | <5.2      | 11.8      |
| Fluconazole N-oxide                                       | 126               | <7.6              | <7.6 | 9.8  | 19.8      | 31.5      | <7.6      |
| 4 hydroxy diclofenac                                      | 4.6               | <2.6              | <2.6 | <2.6 | <2.6      | <2.6      | <2.6      |
| 4-chloro 5-sulfamoylanthranilic acid                      | 713               | 329               | < 75 | 328  | 430       | 188       | 377       |
| N-demethylerythromycin                                    | < 11              | < 11              | < 11 | < 11 | < 11      | < 11      | < 11      |
| Desvenlafaxine                                            | 2945              | 13.2              | <5.1 | 8.4  | 12.9      | 6.2       | 15.5      |
| <b>Ozone dosage: 0.28 g O<sub>3</sub>/ g DOC - Day 12</b> |                   |                   |      |      |           |           |           |
|                                                           | Filtered Effluent | Equalization Tank | GAC  | AIX  | Reference | Biochar 1 | Biochar 2 |
| Alpha hydroxymetoprolol                                   | 128               | 46.3              | <6.2 | 41.0 | 46.6      | 10.2      | 21.1      |
| Citalopram related compound E                             | 22.9              | 35.1              | 5.2  | 29.5 | 31.0      | 10.7      | 15.3      |
| Fluconazole N-oxide                                       | 57.1              | 14.9              | <7.6 | 21.3 | 9.9       | <7.6      | <7.6      |
| 4 hydroxy diclofenac                                      | 5.5               | 2.8               | <2.6 | <2.6 | <2.6      | <2.6      | <2.6      |
| 4-chloro 5-sulfamoylanthranilic acid                      | 691               | 346               | < 75 | 282  | 306       | 240       | 240       |
| N-demethylerythromycin                                    | < 11              | < 11              | < 11 | < 11 | < 11      | < 11      | < 11      |
| Desvenlafaxine                                            | 3330              | 6.6               | <5.1 | 8.1  | 11.2      | 9.7       | 15.1      |

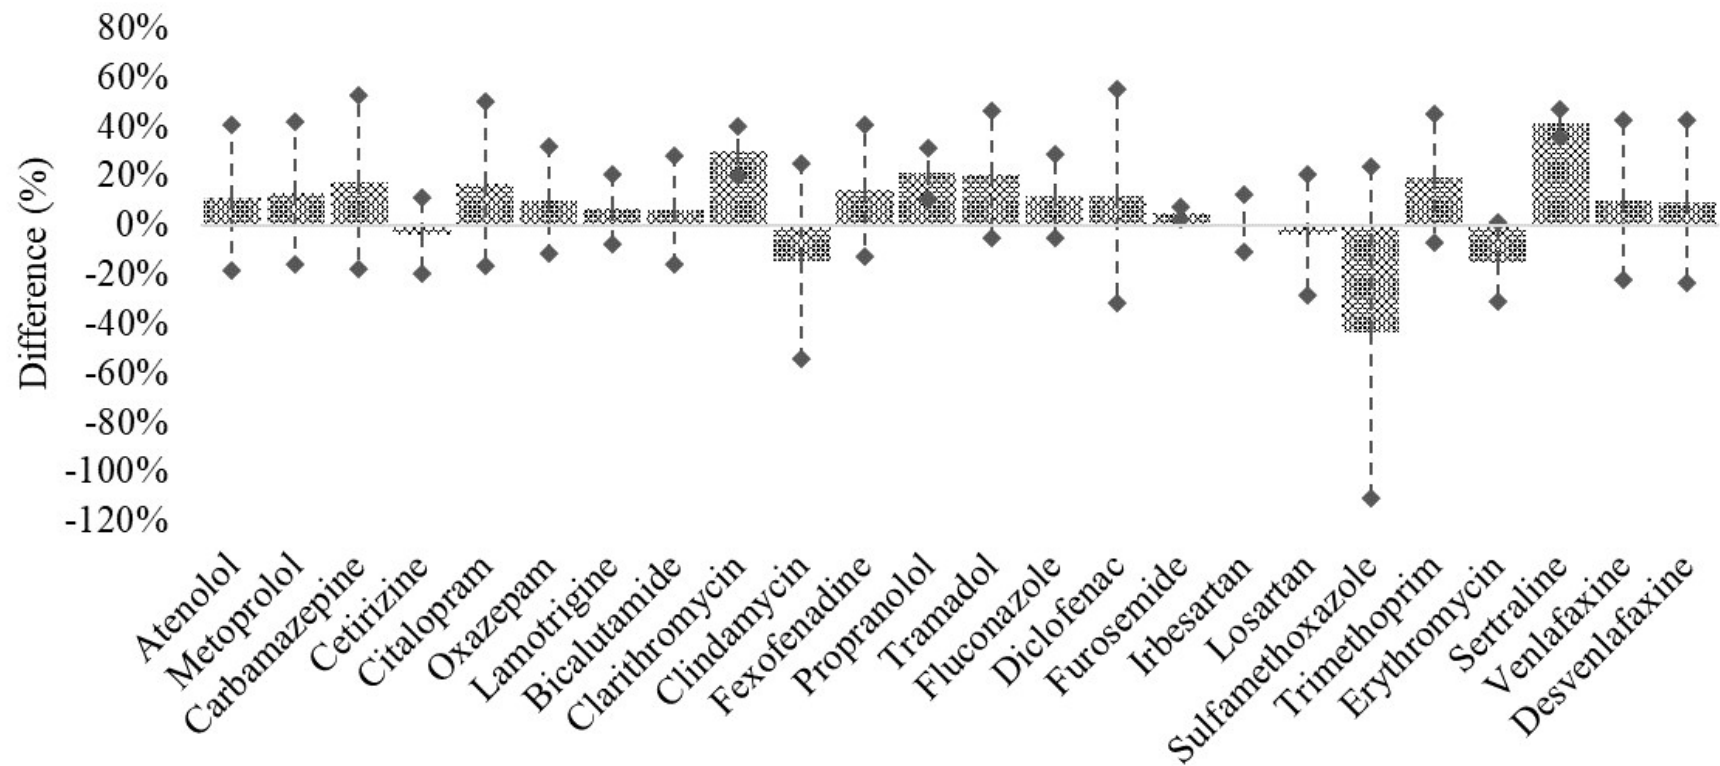

**Figure S1.** The concentration difference between the equalization tank and the reference column as percentage in all samples (n=2-9)
